# Supplementary material
Source: HighWire-hosted journal article supplement (https://www.cancerbiomed.org/content/j.issn.2095-3941.2023.0360)
Supplement: media-1 [file media-1.pdf]

## Supplementary materials

### Methods

A retrospective analysis was conducted on all new Chinese domestic oncology drugs that received regulatory approval on the basis of SATs between January 2018 and December 2022. NDAs for oncology therapeutics (new molecular entities or novel biologics) developed primarily by pharmaceutical companies within China were included, excluding non-therapeutic (e.g., diagnostics), cancer care, licensed-in (developed overseas but licensed to Chinese companies), and generic drugs. SATs described in this article were applicable to only single agents rather than combination therapies for refractory or rare tumors. Data on the clinical efficacy and registration information were obtained primarily from publicly available regulatory review documents. The collected data were analyzed with descriptive statistics, and are presented in tables and figures to illustrate the overall landscape of China's domestic oncology drug regulation.

### Supplementary results

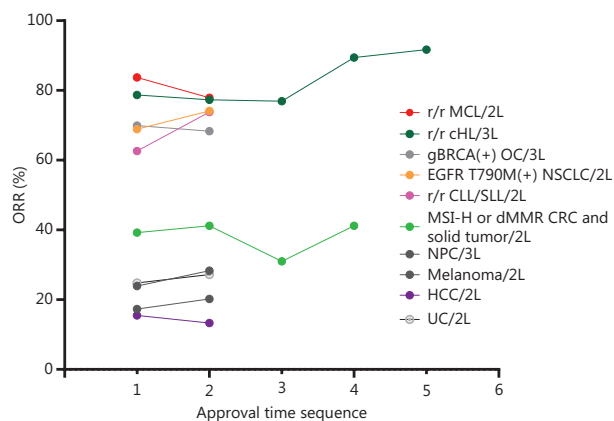

**Figure S1** Objective response rate (ORR) of the domestic-matched Chinese domestic oncology drugs by approval time sequence. Approved drugs with different indications are distinguished by color coding. The L described in the indication represents the line of treatment. The r/r described in the indication represents refractory and relapse. MSI-H, microsatellite instability high; dMMR, deficient mismatch repair; CRC, colorectal cancer; WM, Waldenstrom macroglobulinemia; ALK, anaplastic lymphoma kinase; NSCLC, non-small cell lung carcinoma; EGFR, epidermal growth factor receptor; CLL, chronic lymphocytic leukemia; SLL, small lymphocytic leukemia; MCL, mantle cell lymphoma; HCC, hepatocellular carcinoma; cHL, classical Hodgkin's lymphoma; OC, ovarian cancer; NPC, nasopharyngeal carcinoma; UC, urothelium carcinoma.

**Table S1** Considerations regarding the applicability of single-arm clinical trials to supporting oncology drug approval

| No. | Application scenarios             | Description                                                                                                                                                                                                                                                                                                                                                                                                                                                                                                                      |
|-----|-----------------------------------|----------------------------------------------------------------------------------------------------------------------------------------------------------------------------------------------------------------------------------------------------------------------------------------------------------------------------------------------------------------------------------------------------------------------------------------------------------------------------------------------------------------------------------|
| 1   | No available therapy              | SATs will be considered when an urgent need exists to treat patients with tumors for which no treatment options are available (e.g., advanced refractory recurrent tumors, tumors for which no standard treatment exists, or tumors refractory to standard treatment), However, each participant must be ensured to meet the criteria of having no available therapy.                                                                                                                                                            |
| 2   | Clear mechanism of drug treatment | SATs can be applied if the tumor pathogenesis is clear, and the mechanism of drug action is also clear and consistent with the etiology.                                                                                                                                                                                                                                                                                                                                                                                         |
| 3   | Clear external control data       | Because of the absence of a parallel control group in SATs, sufficient evidence from evidence-based medicine as historical controls must be used. The data sources can be an individual RCT, systematic review studies, meta-analysis data, or even a real-world study.                                                                                                                                                                                                                                                          |
| 4   | Outstanding efficacy              | For drugs with outstanding efficacy, tolerating the uncertainty introduced by SATs is acceptable. In SATs, not only the ORR but also data such as DOR and PFS, which may be associated with survival benefits, should be assessed.                                                                                                                                                                                                                                                                                               |
| 5   | Controllable safety risk          | Early safety data should reflect the safety profile of the investigational drug. If early data show characteristics such as a high mortality rate, drug discontinuation, dose adjustments, or interruptions due to adverse events, or if patients become intolerant because of long-term adverse events, and the incidence of severe adverse events, or grade 3 or 4 adverse events is significantly higher than that in similar treatment populations, cautious consideration the feasibility of conducting a SAT is advisable. |
| 6   | Rare cancer                       | In the case of rare tumors for which conducting an RCT is challenging, SATs may be considered a pivotal study in support of approval. However, the study must be based on evidence of disease characteristics, pathogenesis, and the mechanism of drug action. Notably, SATs may not be applicable to a small number of patients.                                                                                                                                                                                                |

**Table S2** Characteristics of newly approved domestic anti-cancer drugs with marketing application supported by single-arm studies

| Group | Indication                              | Biological pathway  | Active ingredients                                    | Available therapy  | Rare cancer <sup>s</sup> | NDA filing time                          | Approval time (indications)              | Primary outcome          | Sample size             | Registration number of the pivotal trial                 | Efficacy (95% CI) in the pivotal trial                                                       | Required efficacy by NMPA*<br>by NMPA* | Initiation time of the confirmatory trial <sup>#</sup> | Registration number of confirmatory trial                | Full approval conversion (Y/N) |
|-------|-----------------------------------------|---------------------|-------------------------------------------------------|--------------------|--------------------------|------------------------------------------|------------------------------------------|--------------------------|-------------------------|----------------------------------------------------------|----------------------------------------------------------------------------------------------|----------------------------------------|--------------------------------------------------------|----------------------------------------------------------|--------------------------------|
| 1     | MSI-H or dMMR CRC and/or solid tumor/2L | PD1-PDL1 inhibitors | Envafolimab<br>Tislelizumab                           | No                 | Rare                     | 2020.12<br>2021.06                       | 2021.11<br>2022.03                       | ORR<br>ORR               | 103<br>80               | NCT03667170<br>NCT03736889                               | 39.2% (28.4%, 50.9%)<br>41.2% (27.6%, 55.8%)                                                 | 15%<br>15%                             | 2018.08 <sup>a</sup><br>2018.09 <sup>a</sup>           | NCT03667170<br>NCT03736889                               | N<br>N                         |
| 2     | r/r WM/2L                               | BTK inhibitors      | Serplulimab<br>Pucotenlimab                           | Imported available | Rare                     | 2021.04<br>2021.10                       | 2022.03<br>2022.07                       | ORR<br>ORR               | 108<br>100              | NCT03941574<br>NCT03704246                               | 31.0% (17.6%, 47.1%)<br>41.2% (27.6%, 55.8%)                                                 | 15%<br>15%                             | 2019.07 <sup>a</sup><br>2022.11                        | NCT03941574<br>NCT05652894                               | N<br>N                         |
| 3     | ALK(+) NSCLC/2L                         | ALK-TKI inhibitors  | Zanubrutinib<br>Ensartinib                            | Imported available | Rare                     | 2020.09<br>2018.12                       | 2021.06<br>2020.11                       | ORR<br>ORR               | 44<br>160               | NCT03332173<br>NCT03215693                               | 72.1% (56.3%, 84.7%)<br>51.9% (43.8%, 59.9%)                                                 | 30%<br>40%                             | 2017.01<br>2016.06                                     | NCT03053440<br>NCT02767804                               | Y<br>Y                         |
| 4     | EGFR T790M(+) NSCLC/2L                  | EGFR inhibitors     | Almonertinib<br>Furmonertinib                         | Imported available | No                       | 2019.04<br>2019.11                       | 2020.03<br>2021.03                       | ORR<br>ORR               | 244<br>220              | NCT02981108<br>NCT03452592                               | 68.9% (62.6%, 74.6%)<br>74.1% (67.8%, 79.7%)                                                 | 45%<br>45%                             | 2019.02<br>2019.05                                     | NCT03849768<br>NCT03787992                               | Y<br>Y                         |
| 5     | Melanoma/2L                             | PD1-PDL1 inhibitors | Toripalimab<br>Pucotenlimab                           | No                 | Rare                     | 2018.03<br>2021.07                       | 2018.12<br>2022.09                       | ORR<br>ORR               | 128<br>119              | NCT03013101<br>NCT04749485                               | 17.3% (11.2%, 25.0%)<br>20.2% (13.4%, 28.5%)                                                 | 10%<br>10%                             | 2018.02<br>2022.11                                     | NCT03430297<br>NCT05647954                               | N<br>N                         |
| 6     | r/r DLBCL/3L                            | CD19 inhibitors     | Reimacabtegene Autoleuceil                            | No                 | Rare                     | 2020.06                                  | 2021.09                                  | ORR                      | 59                      | NCT04089215                                              | 60.3% (46.6%, 73%)                                                                           | 20%                                    | 2022.03                                                | CTR20220683                                              | N                              |
| 7     | r/r CLL/SLL/2L                          | BTK inhibitors      | Zanubrutinib<br>Orelabrutinib                         | Imported available | Rare                     | 2018.10<br>2019.11                       | 2020.06<br>2020.12                       | ORR<br>ORR               | 91<br>80                | NCT03206918<br>NCT03493217                               | 62.6% (51.9%, 72.6%)<br>73.8% (62.7%, 83.0%)                                                 | 45%<br>45%                             | 2017.11<br>2021.01                                     | NCT03336333<br>NCT04578613                               | N<br>N                         |
| 8     | r/r MCL/2L                              | BTK inhibitors      | Zanubrutinib<br>Orelabrutinib                         | Imported available | Rare                     | 2018.08<br>2020.03                       | 2020.06<br>2020.12                       | ORR<br>ORR               | 86<br>86                | NCT03206970<br>NCT03494179                               | 83.7% (74.2%, 90.8%)<br>77.9% (67.7%, 86.1%)                                                 | 45%<br>45%                             | 2019.08<br>2021.12                                     | NCT04002297<br>NCT05051891                               | N<br>N                         |
| 9     | HCC/2L                                  | PD1-PDL1 inhibitors | Camrelizumab<br>Tislelizumab                          | Imported available | No                       | 2019.05<br>2020.06                       | 2020.03<br>2021.06                       | ORR<br>ORR               | 220<br>249              | NCT02989922<br>NCT03419897                               | 15.5% (10.6%, 21.5%)<br>13.3% (9.3%, 18.1%)                                                  | 7%<br>7%                               | 2019.06<br>2017.12                                     | NCT03764293<br>NCT03412773                               | Y<br>N                         |
| 10    | r/r cHL/3L                              | PD1-PDL1 inhibitors | Sintilimab<br>Camrelizumab                            | No                 | Rare                     | 2018.04<br>2018.04                       | 2018.12<br>2019.05                       | ORR<br>ORR               | 96<br>75                | NCT03114683<br>NCT03155425                               | 78.7% (67.7%, 87.3%)<br>77.3% (65.3%, 86.7%)                                                 | 40%<br>40%                             | 2019.10<br>2020.07                                     | NCT04044222<br>NCT04342936                               | N<br>N                         |
| 11    | gBRCA(+)/OC/3L                          | PARP inhibitors     | Tislelizumab<br>Penpulimab<br>Zimberelimab            | No                 | Rare                     | 2018.08<br>2020.05<br>2020.02            | 2019.12<br>2021.08<br>2021.08            | ORR<br>ORR<br>ORR        | 70<br>94<br>85          | NCT03209973<br>NCT03722147<br>NCT03655483                | 76.9% (64.8%, 86.5%)<br>89.4% (80.8%, 95.0%)<br>91.7% (83.6%, 96.6%)                         | 40%<br>40%<br>40%                      | 2020.09<br>2022.02<br>2022.09                          | NCT04486391<br>NCT05244642<br>NCT05518318                | N<br>N<br>N                    |
| 12    | NPC/3L                                  | PD1-PDL1 inhibitors | Fluzoparib<br>Pamparib<br>Toripalimab<br>Camrelizumab | No                 | Rare                     | 2019.10<br>2020.07<br>2020.05<br>2020.09 | 2020.12<br>2021.04<br>2021.02<br>2021.04 | ORR<br>ORR<br>ORR<br>ORR | 113<br>113<br>92<br>156 | NCT03509636<br>NCT03333915<br>NCT02915432<br>NCT03558191 | 69.9% (60.6%, 78.2%)<br>68.3% (57.1%, 78.1%)<br>23.9% (15.6%, 33.9%)<br>28.3% (21.3%, 36.2%) | 40%<br>40%<br>15%<br>15%               | 2019.04<br>2018.05<br>2018.10<br>2018.11               | NCT03863860<br>NCT03519230<br>NCT03581786<br>NCT03707509 | Y<br>N<br>Y<br>Y               |

**Table S2** Continued

| Group | Indication                    | Biological pathway  | Active ingredients          | Available therapy | Rare cancer <sup>§</sup> | NDA filing time    | Approval time (indications) | Primary outcome | Sample size | Registration number of the pivotal trial | Efficacy (95% CI) in pivotal trial           | Required efficacy by NMPA* by NMPA* | Initiation time of the confirmatory trial <sup>#</sup> | Registration number of confirmatory trial | Full approval conversion (Y/N) |
|-------|-------------------------------|---------------------|-----------------------------|-------------------|--------------------------|--------------------|-----------------------------|-----------------|-------------|------------------------------------------|----------------------------------------------|-------------------------------------|--------------------------------------------------------|-------------------------------------------|--------------------------------|
| 13    | PD-L1(+)/UC/2L<br>UC/2L       | PD1-PDL1 inhibitors | Tislelizumab<br>Toripalimab | Yes, but limited  | No                       | 2019.06<br>2020.05 | 2020.04<br>2021.04          | ORR<br>ORR      | 113<br>151  | NCT04004221<br>NCT03113266               | 24.8% (16.7%, 34.3%)<br>27.2% (19.9%, 35.5%) | 10%<br>10%                          | 2019.05<br>2020.09                                     | NCT03967977<br>NCT04568304                | N<br>N                         |
| 14    | HER2(+)/GC/<br>GEJ/3L         | HER2-ADC            | Distamab vedotin            | Yes, but limited  | No                       | 2020.08            | 2021.06                     | ORR             | 127         | NCT03556345                              | 24.4% (17.2%, 32.8%)                         | 10%                                 | 2020.09                                                | CTR20202569                               | N                              |
| 15    | HER2(+)/UC/2L                 | HER2-ADC            | Distamab vedotin            | Yes, but limited  | No                       | 2021.07            | 2021.12                     | ORR             | 43<br>64    | NCT03507166<br>NCT03809013               | 50.5% (40.6%, 60.3%)                         | 10%                                 | 2022.06                                                | NCT05302284                               | N                              |
| 16    | MET Ex14 skipping<br>NSCLC/2L | C-Met inhibitors    | Savolitinib                 | No                | Rare                     | 2020.06            | 2021.06                     | ORR             | 76          | NCT02897479                              | 42.9% (31.1%, 55.3%)                         | 30%                                 | 2021.08                                                | NCT04923945                               | N                              |
| 17    | T315I(+)/CML/2L               | BCR-ABL1 inhibitors | Olverembatinib              | No                | Rare                     | 2020.09            | 2021.11                     | McyR<br>MaHR    | 41<br>23    | NCT03883087<br>NCT03883100               | 75.6% (59.7%, 87.6%)<br>70.6% (44.0%, 89.7%) | 15%<br>10%                          | 2019.10                                                | NCT04126681                               | N                              |
| 18    | CC/2L                         | PD1/CTLA-4 BsAb     | Cadonilimab                 | No                | No                       | 2021.09            | 2022.06                     | ORR             | 111         | NCT03852251                              | 31.3% (22.4%, 41.4%)                         | 15%                                 | 2021.08                                                | NCT04982237                               | N                              |
| 19    | r/r FL/3L                     | CD19 inhibitors     | Reimacabtagene Autoleuceel  | No                | Rare                     | 2022.03            | 2022.09                     | ORR             | 28          | NCT04089215                              | 85.2% (66.3%, 95.8%)                         | 35%                                 | NA                                                     | NA                                        | N                              |

The L described in the indication represents the line of treatment. The r/r described in the indication represents refractory and recurrent. ORR, objective response rate; OS, overall survival; PFS, progression-free survival; McyR, major cytogenetic response; MaHR, major hematologic response; MSI-H, microsatellite instability high; dMMR, deficient mismatch repair; CRC, colorectal cancer; WM, Waldenstrom macroglobulinemia; ALK, anaplastic lymphoma kinase; NSCLC, non-small-cell lung carcinoma; EGFR, epidermal growth factor receptor; DLBCL, diffuse large B-cell lymphoma; CLL, chronic lymphocytic leukemia; SLL, small lymphocytic leukemia; MCL, mantle cell lymphoma; HCC, hepatocellular carcinoma; PTCL, peripheral T-cell lymphoma; cHL, classical Hodgkin's lymphoma; OC, ovarian cancer; NPC, nasopharyngeal carcinoma; UC, urothelium carcinoma; HER2, human epidermal growth factor receptor 2; GC/GEJ, gastric and gastroesophageal junction cancers; BC, breast cancer; CML, chronic granulocytic leukemia; CC, cervical cancer; FL, follicular lymphoma. \*Required efficacy by NMPA was defined as the agreed lower limits of the efficacy point estimate of ORR (or CR) reported in the regulatory review documents. <sup>#</sup>The initiation time of the confirmatory trial was collected as the actual start date of the trial on ClinicalTrials.gov. <sup>§</sup>The confirmatory trial was the continuation of the previous pivotal trial. <sup>§</sup>The definition of rare cancer was based on terms such as rare and uncommon, as described in the regulatory review report, as well as the relatively authoritative epidemiology-based definition of rare disease involving an incidence or prevalence rate less than 1 in 10,000 or a total number of cases less than 1,400,000.

**Table S3** Characteristics of the confirmatory trial for domestic anti-cancer drugs undergoing full approval conversion

| Group | Indication                              | Active ingredients          | Study design                            | Type of blinding         | Combination therapy                      | Sample size           | Primary outcome | Efficacy                                 | Study population                              | Approval time (new indications) | Front-line therapy (new indications) (Y/N) | Time for full approval conversion (year) |
|-------|-----------------------------------------|-----------------------------|-----------------------------------------|--------------------------|------------------------------------------|-----------------------|-----------------|------------------------------------------|-----------------------------------------------|---------------------------------|--------------------------------------------|------------------------------------------|
| 1     | MSI-H or dMMR CRC and/or solid tumor/2L | Envafolimab<br>Tislelizumab | Single-arm<br>Single-arm                | Open-label<br>Open-label | No<br>No                                 | 200 (103)<br>200 (80) | ORR<br>ORR      | /<br>/                                   | MSI-H or dMMR CRC and/or solid tumor/2L       | /<br>/                          | N<br>N                                     | /<br>/                                   |
|       |                                         | Serplulimab                 | Single-arm                              | Open-label               | No                                       | 108                   | ORR             | /                                        |                                               | /                               | N                                          | /                                        |
|       |                                         | Pucotenlimab                | Chemotherapy control                    | Open-label               | No                                       | 190                   | PFS             | /                                        | MSI-H or dMMR CRC/1L                          | /                               | Y                                          | /                                        |
| 2     | r/r WM/2L                               | Zanubrutinib <sup>1</sup>   | Active control (fbrutinib)              | Open-label               | No                                       | 201                   | VGPR+CR         | 36.3% vs 25.3% (p = 0.07)                | WM/1L                                         | 2023.05                         | Y                                          | 2.9                                      |
| 3     | ALK(+) NSCLC/2L                         | Ensartinib                  | Active control (crizotinib)             | Open-label               | No                                       | 290                   | PFS             | mPFS: 25.8 m vs 12.7 m<br>HR (PFS): 0.56 | ALK(+) NSCLC/1L                               | 2022.03                         | Y                                          | 1.3                                      |
| 4     | EGFR T790M(+) NSCLC/2L                  | Almonertinib                | Active control (gefitinib)              | Double-blind             | No                                       | 429                   | PFS             | mPFS: 19.3 m vs 9.9 m<br>HR (PFS): 0.46  | EGFR(+) Ex19del and/or Ex21L858R substitution | 2021.12                         | Y                                          | 2.7                                      |
|       |                                         | Furmonertinib               | Active control (gefitinib)              | Double-blind             | No                                       | 358                   | PFS             | mPFS: 20.8 m vs 11.1 m<br>HR (PFS): 0.44 | NSCLC/1L                                      | 2022.06                         | Y                                          | 2.6                                      |
| 5     | Melanoma/2L                             | Toripalimab                 | Active control (dacarbazine)            | Open-label               | No                                       | 230                   | PFS             | /                                        | Melanoma/1L                                   | /                               | Y                                          | /                                        |
|       |                                         | Pucotenlimab                | Active control (temozolomide)           | Open-label               | Transcatheter arterial chemoembolization | 350                   | PFS             | /                                        | Stage IV melanoma/1L                          | /                               | Y                                          | /                                        |
| 6     | r/r DLBCL/3L                            | Relmacabiagene Autoleucei   | Single-arm                              | Open-label               | No                                       | 41                    | ORR             | /                                        | r/r DLBCL/3L                                  | /                               | N                                          | /                                        |
| 7     | r/r CLL/SLL/2L                          | Zanubrutinib <sup>2</sup>   | Active control (bendamustine+rituximab) | Open-label               | No                                       | 740                   | PFS             | HR (PFS): 0.42                           | CLL/SLL/1L                                    | 2023.05                         | Y                                          | 4.6                                      |
|       |                                         | Orelabrutinib               | Active control (chlorambucil+rituximab) | Open-label               | No                                       | 218                   | PFS             | /                                        |                                               | /                               | Y                                          | /                                        |
| 8     | r/r MCL/2L                              | Zanubrutinib                | Active control (bendamustine+rituximab) | Open-label               | Rituximab                                | 500                   | PFS             | /                                        | MCL/1L                                        | /                               | Y                                          | /                                        |
|       |                                         | Orelabrutinib               | R-CHOP add-on                           | Open-label               | R-CHOP                                   | 356                   | PFS             | /                                        |                                               | /                               | Y                                          | /                                        |
| 9     | HCC/2L                                  | Camrelizumab <sup>3</sup>   | Active control (sorafenib)              | Open-label               | Apatinib                                 | 543                   | PFS             | mPFS: 5.6 m vs 3.7 m<br>HR (PFS): 0.52   | HCC/1L                                        | 2023.01                         | Y                                          | 2.8                                      |
|       |                                         | Tislelizumab                | Active control (sorafenib)              | Open-label               | No                                       | 674                   | PFS             | /                                        |                                               | 2022.12 (NDA)                   | Y                                          | /                                        |
| 10    | r/r cHL/3L                              | Sintilimab                  | Placebo control                         | Double-blind             | ICE regimen                              | 240                   | PFS             | /                                        | cHL/2L                                        | /                               | Y                                          | /                                        |
|       |                                         | Camrelizumab                | Chemotherapy control                    | Open-label               | No                                       | 56                    | PFS             | /                                        | r/r cHL/3L                                    | /                               | N                                          | /                                        |
|       |                                         | Tislelizumab                | Chemotherapy control                    | Open-label               | No                                       | 123                   | PFS             | /                                        | r/r cHL/3L                                    | /                               | N                                          | /                                        |
|       |                                         | Penpulimab                  | Chemotherapy control                    | Open-label               | No                                       | 60                    | PFS             | /                                        | r/r cHL/3L                                    | /                               | N                                          | /                                        |
|       |                                         | Zimberelimab                | Chemotherapy control                    | Open-label               | No                                       | 60                    | PFS             | /                                        | r/r cHL/3L                                    | /                               | N                                          | /                                        |

**Table S3** Continued

| Group | Indication                 | Active ingredients | Study design                               | Type of blinding | Combination therapy        | Sample size | Primary outcome | Efficacy                                | Study population           | Approval time (new indications) | Front-line therapy (new indications) (Y/N) | Time for full approval conversion (Year) |
|-------|----------------------------|--------------------|--------------------------------------------|------------------|----------------------------|-------------|-----------------|-----------------------------------------|----------------------------|---------------------------------|--------------------------------------------|------------------------------------------|
| 11    | gBRCA(+)/OC/3L             | Fluzoparib         | Placebo control                            | Double-blind     | No                         | 252         | PFS             | mPFS: 12.9 m vs 5.5 m<br>HR (PFS): 0.25 | rOC/2L maintenance         | 2021.06                         | Y                                          | 0.5                                      |
|       |                            | Pamiparib          | Placebo control                            | Double-blind     | No                         | 216         | PFS             | /                                       |                            | /                               | Y                                          | /                                        |
| 12    | NPC/3L                     | Toripalimab        | Placebo control                            | Double-blind     | Cisplatin+gemcitabine      | 289         | PFS             | mPFS: 11.7 m vs 8.0 m<br>HR (PFS): 0.52 | r/m NPC/1L                 | 2021.11                         | Y                                          | 0.8                                      |
|       |                            | Camelizumab        | Placebo control                            | Double-blind     |                            | 231         | PFS             | mPFS: 9.7 m vs 6.9 m<br>HR (PFS): 0.54  |                            | 2021.06                         | Y                                          | 0.2                                      |
| 13    | PD-L1(+)/UC/2L             | Tislelizumab       | Placebo+chemotherapy control               | Double-blind     | Chemotherapy               | 420         | PFS             | /                                       | UC/1L                      | /                               | Y                                          | /                                        |
|       | UC/2L                      | Toripalimab        | Placebo+chemotherapy control               | Double-blind     | Chemotherapy               | 364         | PFS             | /                                       |                            | /                               | Y                                          | /                                        |
| 14    | HER2(+)/GC/GEJC/3L         | Disitamab vedotin  | Physician choice control                   | Open-label       | No                         | 351         | OS              | /                                       | HER2(+)/GC/GEJC/3L         | /                               | N                                          | /                                        |
| 15    | HER2(+)/UC/2L              | Disitamab vedotin  | Chemotherapy control                       | Open-label       | Toripalimab                | 452         | PFS             | /                                       | HER2(+)/UC/1L              | /                               | Y                                          | /                                        |
| 16    | MET Ex14 skipping NSCLC/2L | Savolitinib        | Single-arm                                 | Open-label       | No                         | 163         | ORR             | /                                       | MET Ex14 skipping NSCLC/1L | /                               | Y                                          | /                                        |
| 17    | T315L(+)/CML/2L            | Olverembatinib     | Best available therapy control             | Open-label       | No                         | 144         | PFS             | /                                       | CML-CP/2L                  | /                               | N                                          | /                                        |
| 18    | CC/2L                      | Cadonilimab        | Placebo+chemotherapy ± bevacizumab control | Double-blind     | Chemotherapy ± bevacizumab | 440         | PFS             | /                                       | CC/1L                      | /                               | Y                                          | /                                        |

The L described in the indication represents the line of treatment. The r/r described in the indication represents refractory and recurrent. ORR, objective response rate; OS, overall survival; PFS, progression-free survival; MycR, major cytogenetic response; MaHR, major hematologic response; MSI-H, microsatellite instability high; dMMR, deficient mismatch repair; CRC, colorectal cancer; WM, Waldenstrom macroglobulinemia; ALK, anaplastic lymphoma kinase; NSCLC, non-small-cell lung carcinoma; EGFR, epidermal growth factor receptor; DLBCL, diffuse large B-cell lymphoma; CLL, chronic lymphocytic leukemia; SLL, small lymphocytic leukemia; MCL, mantle cell lymphoma; HCC, hepatocellular carcinoma; PTCL, peripheral T-cell lymphoma; cHL, classical Hodgkin's lymphoma; OC, ovarian cancer; NPC, nasopharyngeal carcinoma; UC, urothelium carcinoma; HER2, human epidermal growth factor receptor 2; GC/GEJC, gastric and gastroesophageal junction cancers; BC, breast cancer; CML, chronic granulocytic leukemia; CC, cervical cancer; FL, follicular lymphoma.

## References

1. Dimopoulos MA, Opat S, D'Sa S, Jurczak W, Lee HP, Cull G, et al. Zanubrutinib versus ibrutinib in symptomatic waldenström macroglobulinemia: final analysis from the randomized phase III ASPEN study. *J Clin Oncol*. 2023;JCO2202830. doi: 10.1200/JCO.22.02830. Epub ahead of print. PMID: 37478390.
2. Tam CS, Giannopoulos K, Jurczak W, Simkovic M, Shadman A, Osterborg A, et al. SEQUOIA: results of a phase 3 randomized study of zanubrutinib versus bendamustine+ rituximab (BR) in patients with treatment-naïve (TN) chronic lymphocytic leukemia/small lymphocytic lymphoma (CLL/SLL). *Blood*. 2021; 138: 396.
3. Qin S, Chan SL, Gu S, Bai Y, Ren Z, Lin X, et al.; CARES-310 Study Group. Camrelizumab plus rivoceranib versus sorafenib as first-line therapy for unresectable hepatocellular carcinoma (CARES-310): a randomised, open-label, international phase 3 study. *Lancet*. 2023; 402: 1133-1146.
